# Supplementary material for: Antioxidant Activity of Different Hop (Humulus lupulus L.) Genotypes
Source: MDPI journal article supplement (doi:10.3390/plants12193436), 2023-09-29
Supplement: s1 [file s1]

# Plants

## Supplementary Material

### Antioxidant Activity of Different Hop (*Humulus lupulus* L.) Genotypes

Zala Kolenc<sup>1,3,4</sup>, Tamara Hribernik<sup>2</sup>, Tomaž Langerholc<sup>4</sup>, Maša Pintarič<sup>4</sup>, Maja Prevolnik Povše<sup>5</sup> and Urban Bren<sup>1,3,6</sup> \*

<sup>1</sup> Laboratory of Physical Chemistry and Chemical Thermodynamics, Faculty of Chemistry and Chemical Engineering, University of Maribor, Smetanova ulica 17, SI-2000 Maribor, Slovenia; zala.kolenc@um.si (Z.K.)

<sup>2</sup> Department of Livestock Breeding and Nutrition, University of Maribor, Pivola 10, SI-2311 Hoče, Slovenia; tamara.hribernik1996@gmail.com (T.H.)

<sup>3</sup> Department of Applied Natural Sciences, Faculty of Mathematics, Natural Sciences and Information Technologies, University of Primorska, Glagoljaška ulica 8, SI-6000 Koper, Slovenia; urban.bren@um.si (U.B.)

<sup>4</sup> Department of Microbiology, Biochemistry, Molecular Biology and Biotechnology, Faculty of Agriculture and Life Sciences, University of Maribor, Pivola 10, SI-2311 Hoče, Slovenia; tomaz.langerholc@um.si (T.L.); ma-sa.pintaric@um.si (M.P.)

<sup>5</sup> Department of Animal Science, Faculty of Agriculture and Life Sciences, University of Maribor, Pivola 10, SI-2311 Hoče, Slovenia; maja.prevolnik@um.si (M.P.P.)

<sup>6</sup> Institute of Environmental Protection and Sensors, Beloruska ulica 7, SI-2000 Maribor, Slovenia

\* Correspondence: urban.bren@um.si, Tel.: +386-2-229-4421

\* Corresponding Author

**E-mail address:** urban.bren@um.si

**tel.:** +386-2-229-4421.

Table S1: FRAP, ORAC and IA potential values.

| Samples/Measurement          | FRAP ( $\mu\text{mol TE/g DM}$ ) | ORAC ( $\mu\text{mol TE/g DM}$ ) | IA ( $\text{mmol TE/g DM}$ ) |
|------------------------------|----------------------------------|----------------------------------|------------------------------|
| <b>Hop genotypes</b>         |                                  |                                  |                              |
| Aurora                       | 68.7 $\pm$ 1.3                   | 1909.1 $\pm$ 53.9                | 88.6 $\pm$ 16.0              |
| Savinjski golding            | 101.6 $\pm$ 2.2                  | 1695.6 $\pm$ 102.1               | 52.7 $\pm$ 11.5              |
| Styrian Wolf                 | 68.6 $\pm$ 0.7                   | 1686.7 $\pm$ 67.4                | 83.3 $\pm$ 24.3              |
| Styrian Dragon               | 70.6 $\pm$ 1.8                   | 1592.7 $\pm$ 49.0                | 78.4 $\pm$ 18.3              |
| Styrian Eureka               | 63.5 $\pm$ 0.5                   | 1910.7 $\pm$ 73.8                | 79.5 $\pm$ 25.5              |
| Styrian Fox                  | 69.2 $\pm$ 2.9                   | 1722.3 $\pm$ 31.6                | 81.8 $\pm$ 30.1              |
| Styrian Eagle                | 70.5 $\pm$ 0.4                   | 1653.7 $\pm$ 69.4                | 112.4 $\pm$ 8.1              |
| Chocotsu No.17 S168 Japan    | 82.0 $\pm$ 1.4                   | 1496.7 $\pm$ 29.0                | 73.3 $\pm$ 1.5               |
| Nugget (USA) S222            | 75.1 $\pm$ 1.1                   | 1723.8 $\pm$ 39.9                | 118.0 $\pm$ 31.8             |
| Belgium S367 P157            | 86.4 $\pm$ 1.8                   | 1735.8 $\pm$ 21.1                | 88.7 $\pm$ 26.6              |
| Dekorativny (Russia) S248    | 90.0 $\pm$ 0.5                   | 1686.9 $\pm$ 77.2                | 106.2 $\pm$ 29.3             |
| Early promise (England) S68  | 85.9 $\pm$ 2.1                   | 1544.1 $\pm$ 39.1                | 78.7 $\pm$ 16.0              |
| Canada P169 S369             | 82.8 $\pm$ 2.1                   | 1588.9 $\pm$ 43.5                | 92.4 $\pm$ 21.5              |
| Caucasus S353 P15            | 97.2 $\pm$ 0.6                   | 1069.4 $\pm$ 34.3                | 65.0 $\pm$ 10.1              |
| <b>Hop purified extracts</b> |                                  |                                  |                              |
| $\alpha\beta$ - AF           | 121.3 $\pm$ 0.7                  | 861.6 $\pm$ 60.6                 | 68.6 $\pm$ 28.0              |
| $\beta$ - AF                 | 79.8 $\pm$ 4.3                   | 992.7 $\pm$ 56.5                 | 150.4 $\pm$ 32.1             |

The average  $\pm$  standard deviation is presented.
